# Supplementary material for: c-Src drives intestinal regeneration and transformation
Source: PubMed Central journal article supplement — EMBO J. 2014 Apr 30;33(13):1474–91. doi: 10.1002/embj.201387454 (PMC4194090; doi:10.1002/embj.201387454), 2014-04-30
Supplement: embj0033-1474-sd1.pdf [file embj0033-1474-sd1.pdf]

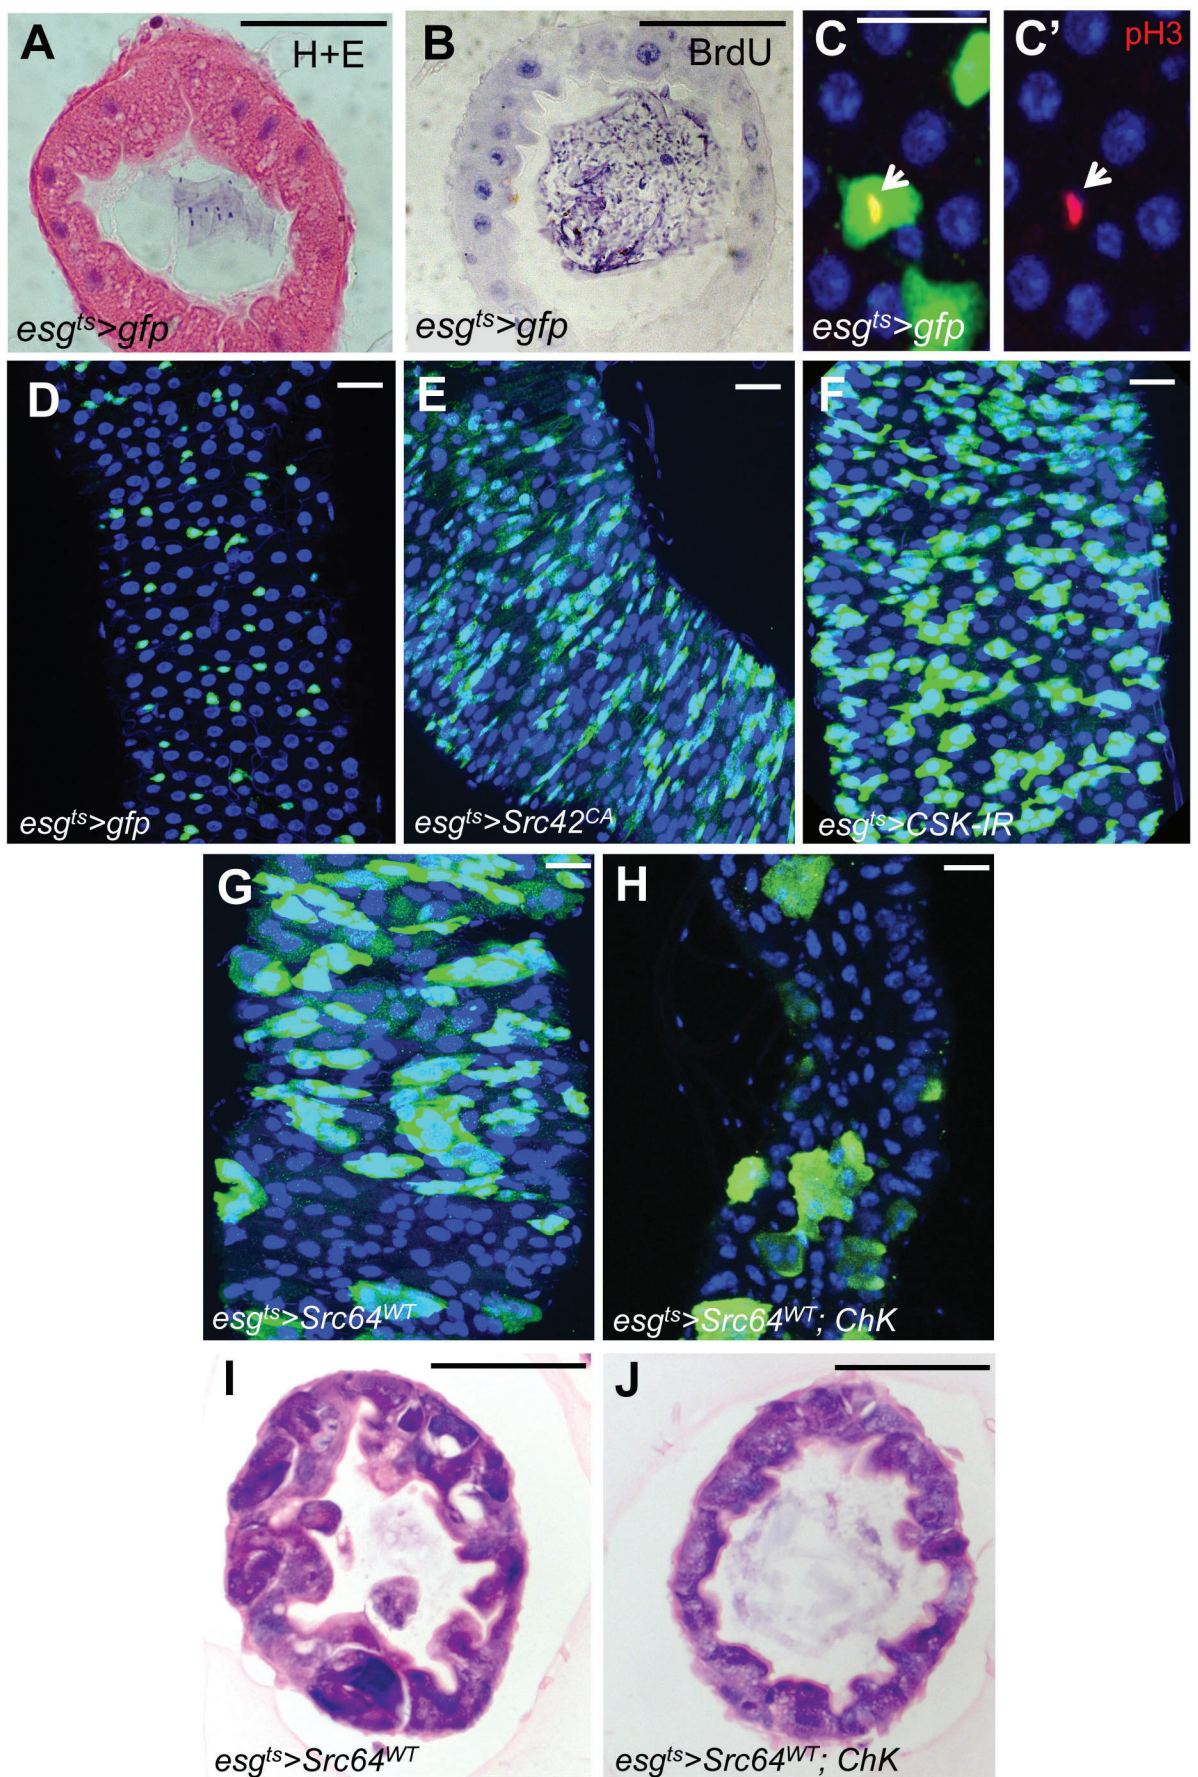

**Figure S1**

**Figure S1: Src drives ISC hyperproliferation in the adult *Drosophila* midgut.** (A, B) 7-day old paraffin embedded *esg<sup>ts</sup>>gfp* intestines analyzed by Haematoxylin and Eosin H+E (A) and BrdU (B) staining. Scale bars: 50um. (C, C') 7 day-old *esg<sup>ts</sup>>gfp* midguts stained with anti-pH3 (red) to visualize proliferating ISCs (arrow). Scale bar: 20um. (D-H) Adult posterior midguts from control animals (*esg<sup>ts</sup>>gfp*) or animals overexpressing Src (*esg<sup>ts</sup>>Scr64<sup>wt</sup>* or *esg<sup>ts</sup>>Scr42<sup>CA</sup>*) or RNA interference for the Src inhibitor Csk (*esg<sup>ts</sup>>Csk-IR*). Note that co-expression of human ChK (*esg<sup>ts</sup>>Scr64<sup>wt</sup>; Chk*) suppresses Src-driven hyperproliferation in the *Drosophila* midgut. D, E, G, H were analysed 7 days after transgene induction while F was analysed 14 days after transgene induction. (I, J) H+E staining of paraffin embedded midguts as in G, H. Scale bars: 50um
