# Supplementary material for: c-Src drives intestinal regeneration and transformation
Source: PubMed Central journal article supplement — EMBO J. 2014 Apr 30;33(13):1474–91. doi: 10.1002/embj.201387454 (PMC4194090; doi:10.1002/embj.201387454), 2014-04-30
Supplement: embj0033-1474-sd2.pdf [file embj0033-1474-sd2.pdf]

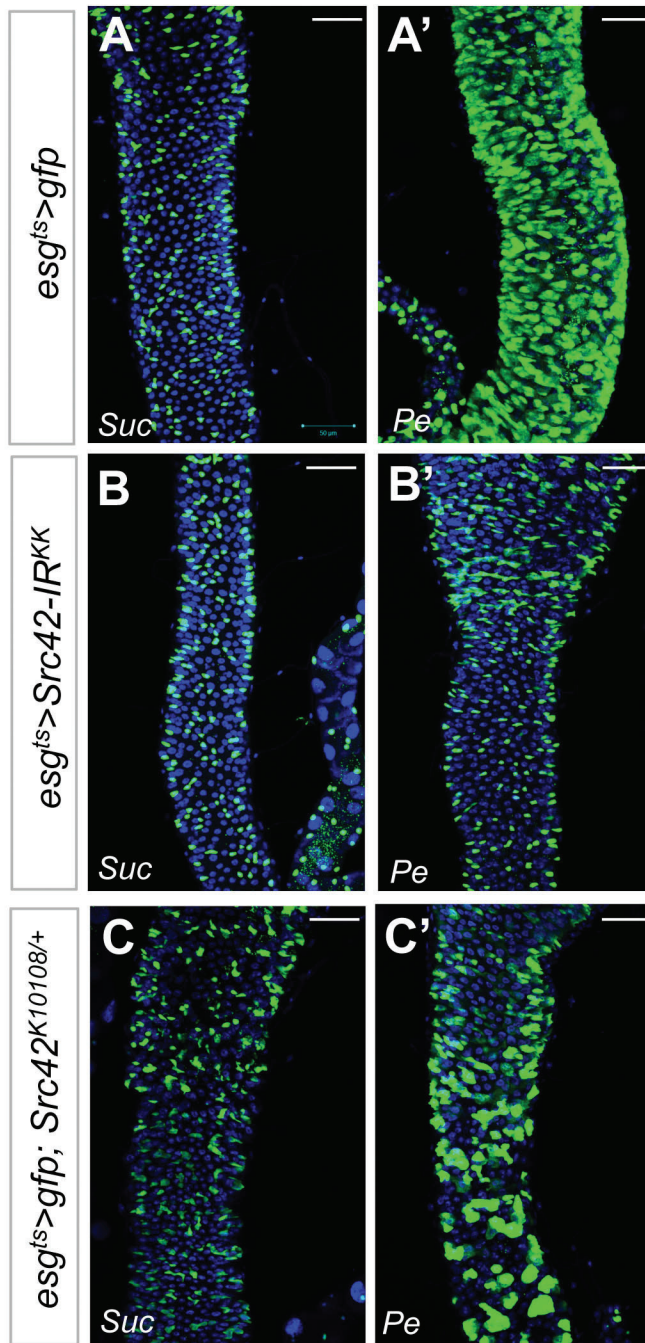

**Figure S2**

**Figure S2: Src is required for ISC proliferation in the regenerating adult *Drosophila* midgut.** (A-C') Posterior midguts from 14 day old Suc or *Pe* fed- control animals (A, A'; *esg<sup>ts</sup>>gfp*), animals subject to RNAi-knockdown of *Src42* in stem/progenitor cells (B, B'; *esg<sup>ts</sup>>Src42-IR<sup>KK</sup>*) or heterozygotes for the loss of function allele *Src42<sup>K10108</sup>* (C, C'). Scale bars: 50um
