# Supplementary material for: c-Src drives intestinal regeneration and transformation
Source: PubMed Central journal article supplement — EMBO J. 2014 Apr 30;33(13):1474–91. doi: 10.1002/embj.201387454 (PMC4194090; doi:10.1002/embj.201387454), 2014-04-30
Supplement: embj0033-1474-sd3.pdf [file embj0033-1474-sd3.pdf]

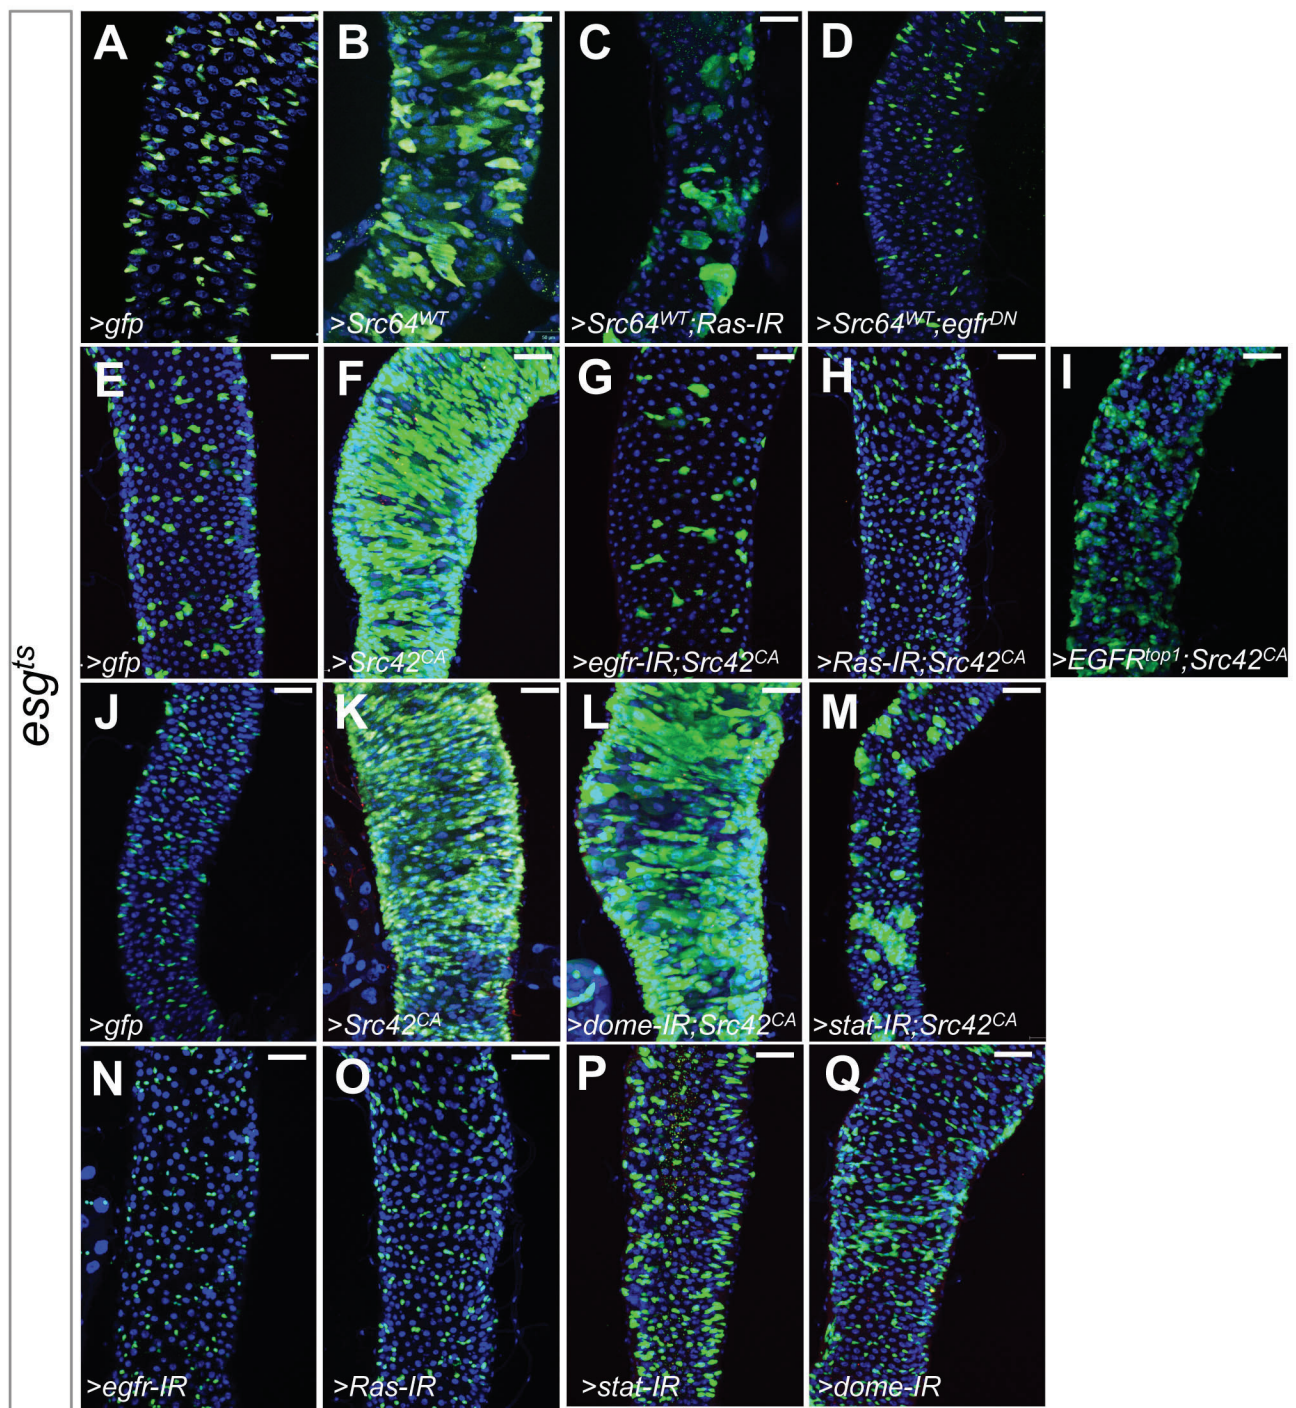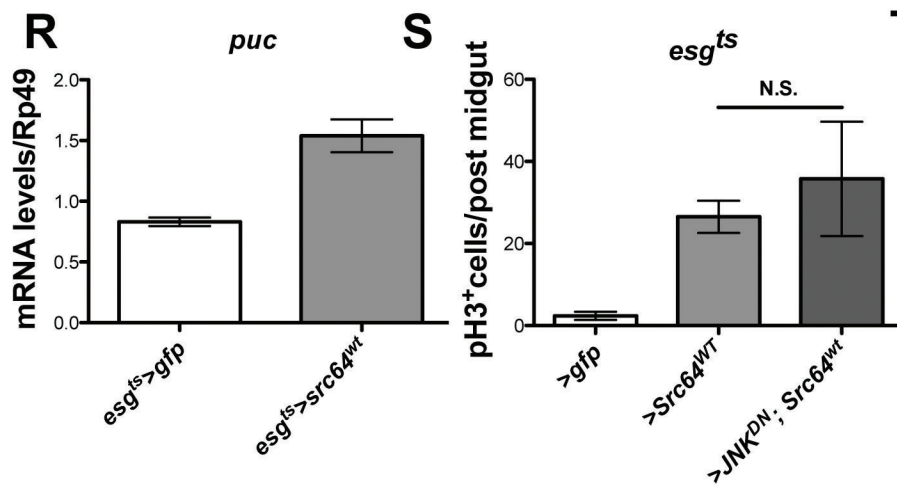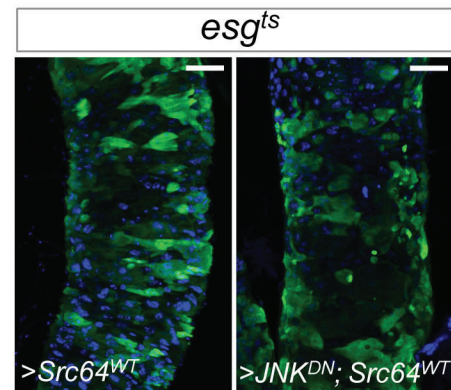

**Figure S3**

**Figure S3: Src drives ISC hyperproliferation through upregulation of the EGFR/MAPK and Stat signalling pathway.** (A-Q) Adult posterior midguts from animals of the indicated genotypes after 7 days of transgene expression. Knockdown of EGFR/Ras or Stat in ISCs/EBs suppresses hyperproliferation in *Src* overexpressing midguts. (R) qRT-PCR from control (*esg<sup>ts</sup>>gfp*) and *Src* overexpressing (*esg<sup>ts</sup>>Scr64<sup>wt</sup>*) whole midguts to assess JNK signalling activation through transcript levels of the JNK target and phosphatase *puckered* (*puc*). *Src* overexpression results in *puc* upregulation. (S) Quantification of ISC proliferation in posterior midguts from animals of the indicated genotypes after 7 days of transgene expression. Data represent average values  $\pm$  S.E.M. (one-way ANOVA with Bonferroni's Multiple Comparison Test). N.S. (Non-statistically significant). (T) Immunofluorescence of posterior midguts as in S. JNK inhibition in ISCs/EBs does not suppress ISC hyperproliferation in *Src* overexpressing midguts. Scale bars: 50um
