# Supplementary material for: c-Src drives intestinal regeneration and transformation
Source: PubMed Central journal article supplement — EMBO J. 2014 Apr 30;33(13):1474–91. doi: 10.1002/embj.201387454 (PMC4194090; doi:10.1002/embj.201387454), 2014-04-30
Supplement: embj0033-1474-sd4.pdf [file embj0033-1474-sd4.pdf]

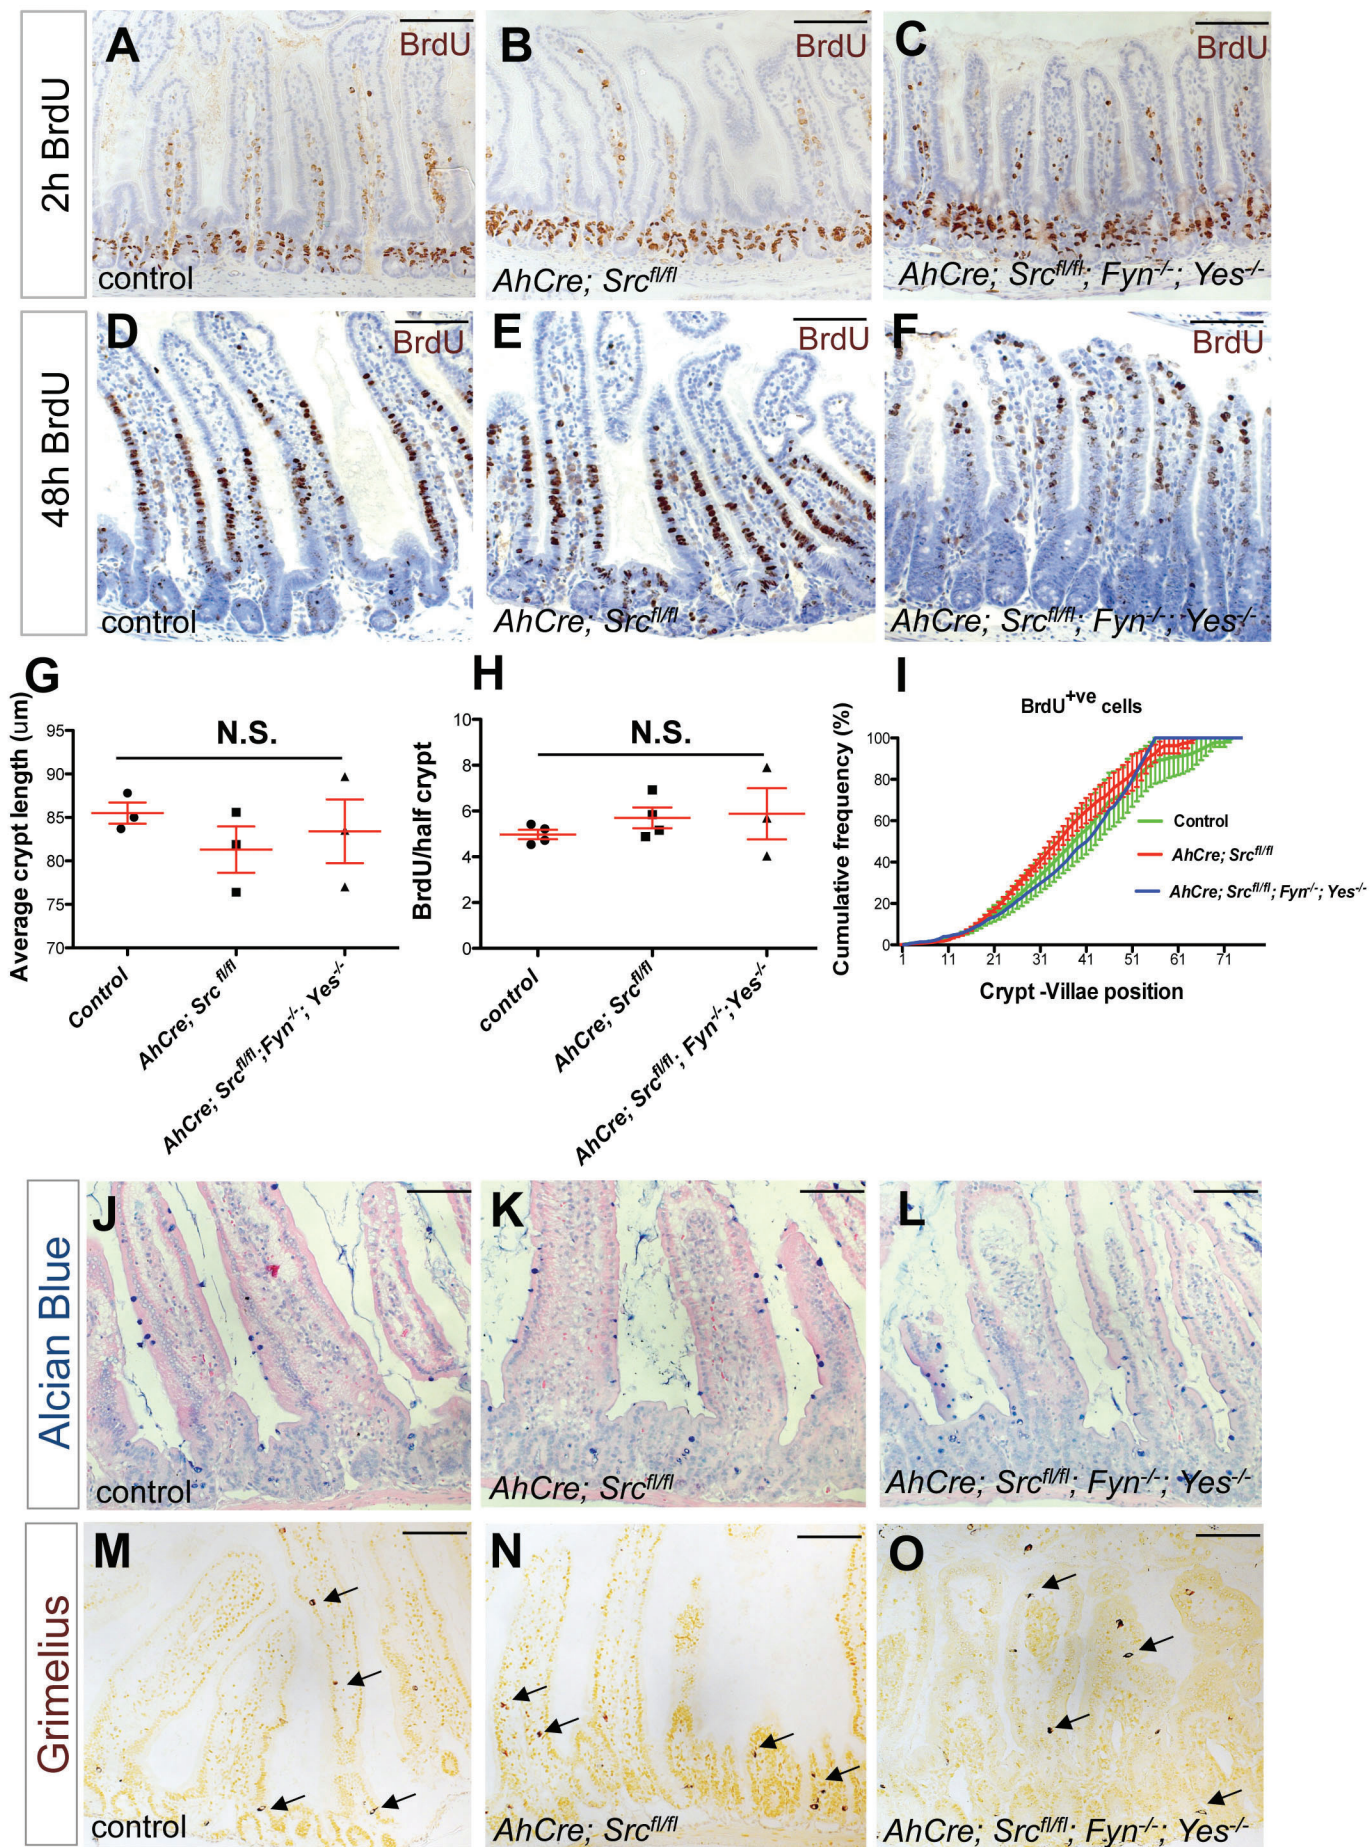

**Figure S4**

**Figure S4: Src, Fyn and Yes are redundant for homeostatic self-renewal of the mouse small intestine.** (A-F) BrdU staining of small intestines from control mice (A, D) or mice subject intestinal epithelial knockout of Src only (*AhCre; Src<sup>fl/fl</sup>*) (B, E) or in combination with constitutive knockout of Fyn and Yes (*AhCre; Src<sup>fl/fl</sup>; Fyn<sup>-/-</sup>; Yes<sup>-/-</sup>*) (C, F). Tissues in A-C correspond to mice subject to 4-day gene knockout while tissues in D-F are from mice subject to 6-day gene knockout. (G) Quantification of crypt length in small intestines from mice of the indicated genotypes 4-days after gene knockout. (H) Quantification of proliferation in intestines as in A-C after a 2hr pulse of BrdU labeling. Data in G, H is presented as dotplots indicating mean values from all mice scored  $\pm$  S.E.M. Each dot represents the average values obtained per mouse. Statistical analysis was done by one-way ANOVA with Bonferroni's Multiple Comparison Test. N.S. (Non-statistically significant). (I) Quantification of cell migration in intestines as in D-F after a 48hr pulse of BrdU labeling. Data in the green and red curves represent average cumulative percentage from three mice  $\pm$  S.E.M. The blue curve corresponds to data from one mouse. Statistical analysis was done by Mann-Whitney Test, which showed no significant difference in cell migration between the different genotypes. (J-O) Small intestines from mice of the indicated genotypes stained with Alcian Blue (J-L) and Grimelius (M-O) to visualize Goblet and Enteroendocrine cells (arrows), respectively. Scale bars: 100um.
