# Supplementary material for: c-Src drives intestinal regeneration and transformation
Source: PubMed Central journal article supplement — EMBO J. 2014 Apr 30;33(13):1474–91. doi: 10.1002/embj.201387454 (PMC4194090; doi:10.1002/embj.201387454), 2014-04-30
Supplement: embj0033-1474-sd6.pdf [file embj0033-1474-sd6.pdf]

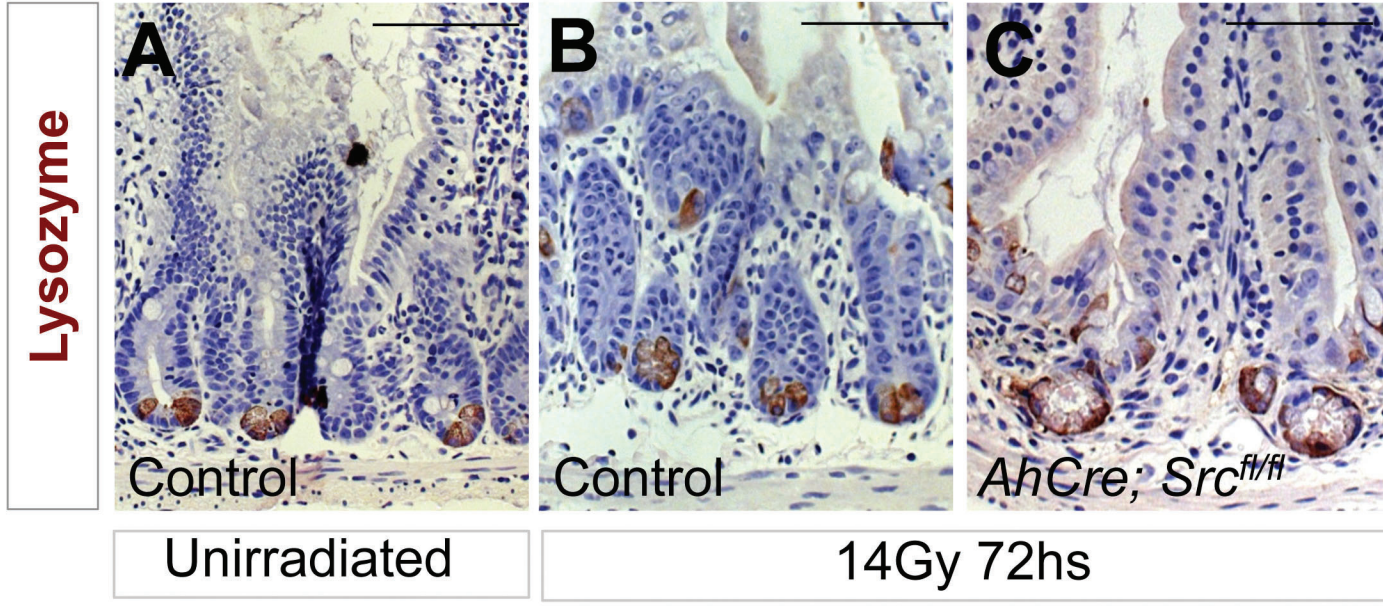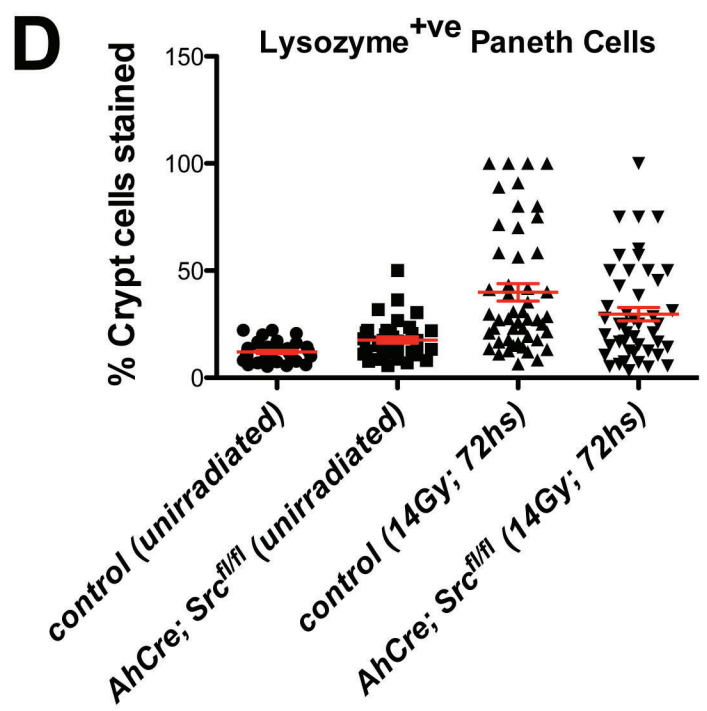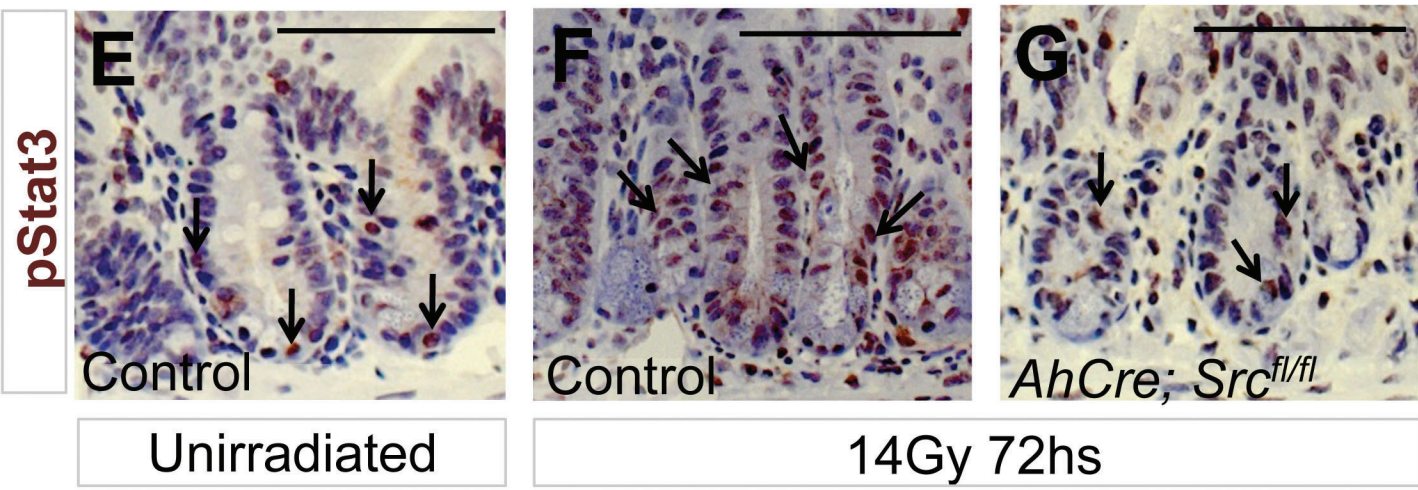

**Figure S6**

**Figure S6: Visualization of Paneth cells and Stat3 activation in regenerating mouse intestines.** (A-C) Paneth cells labeling by anti-Lysozyme immunostaining of small intestines from unirradiated control and irradiated control and *AhCre; Src<sup>fl/fl</sup>* mice. (D) Quantification of the percentage of Paneth cells per crypt in control and *AhCre; Src<sup>fl/fl</sup>* mice before and after irradiation. Knocking out *Src* from the intestinal epithelium did not affect the proportion of Paneth cells per crypt in any of the conditions. (E-G) Magnified views of images from Figure 7J-L depicting pStat3 immunostaining within small intestinal crypts. Arrows point to pStat3 positive (pStat3<sup>+ve</sup>) cells. Note the presence of multiple pStat3<sup>+ve</sup> cells throughout the crypts in F versus a few individual pStat3<sup>+ve</sup> cells per crypt in E and G.
