# Supplementary material for: c-Src drives intestinal regeneration and transformation
Source: PubMed Central journal article supplement — EMBO J. 2014 Apr 30;33(13):1474–91. doi: 10.1002/embj.201387454 (PMC4194090; doi:10.1002/embj.201387454), 2014-04-30
Supplement: embj0033-1474-sd7.pdf [file embj0033-1474-sd7.pdf]

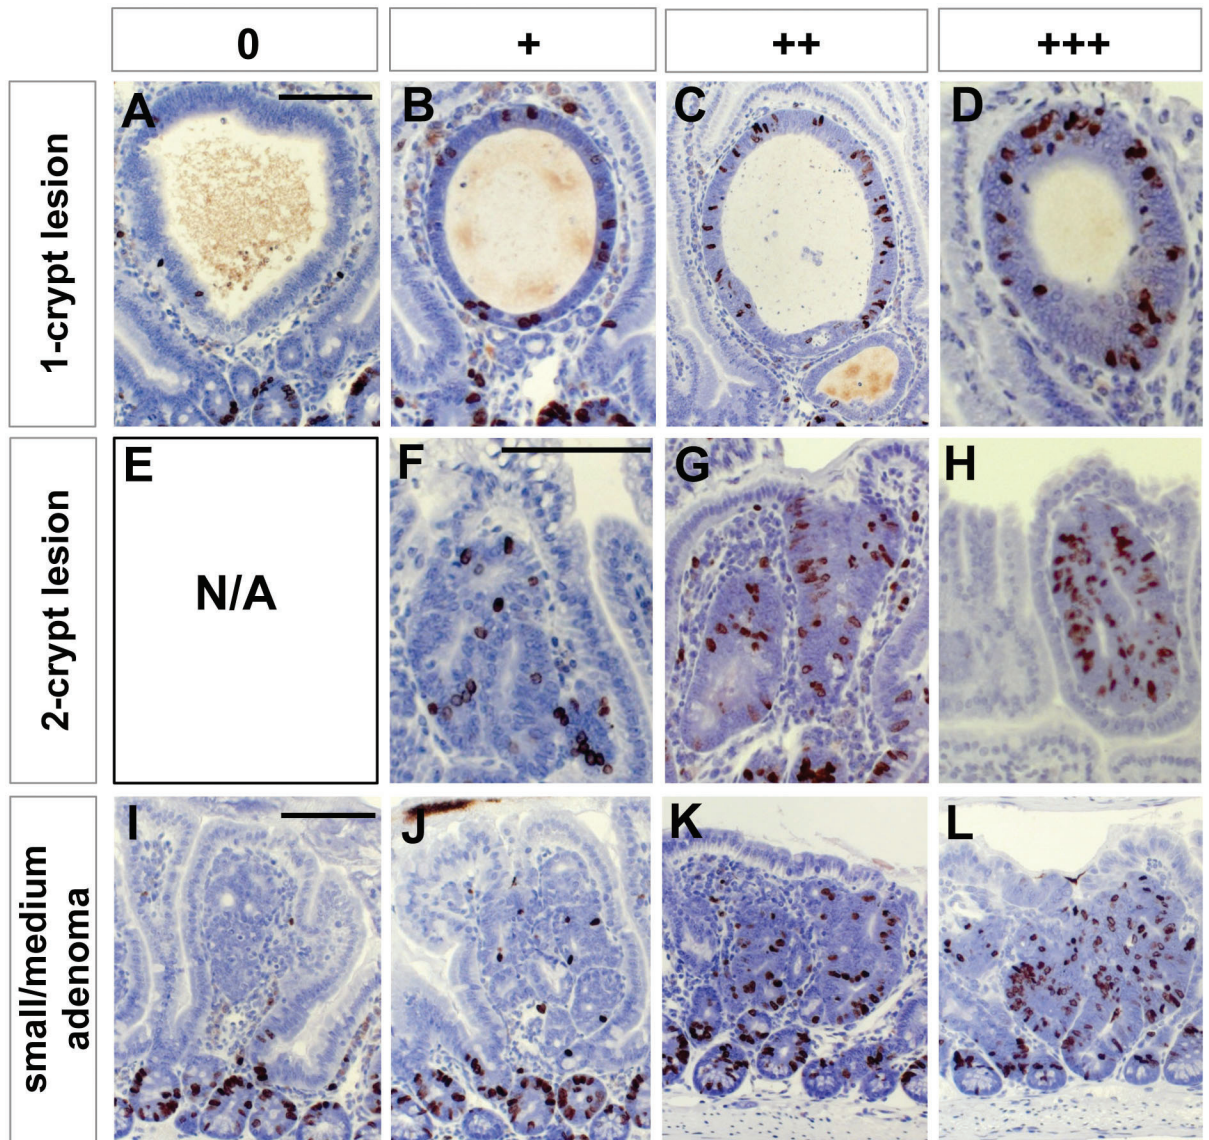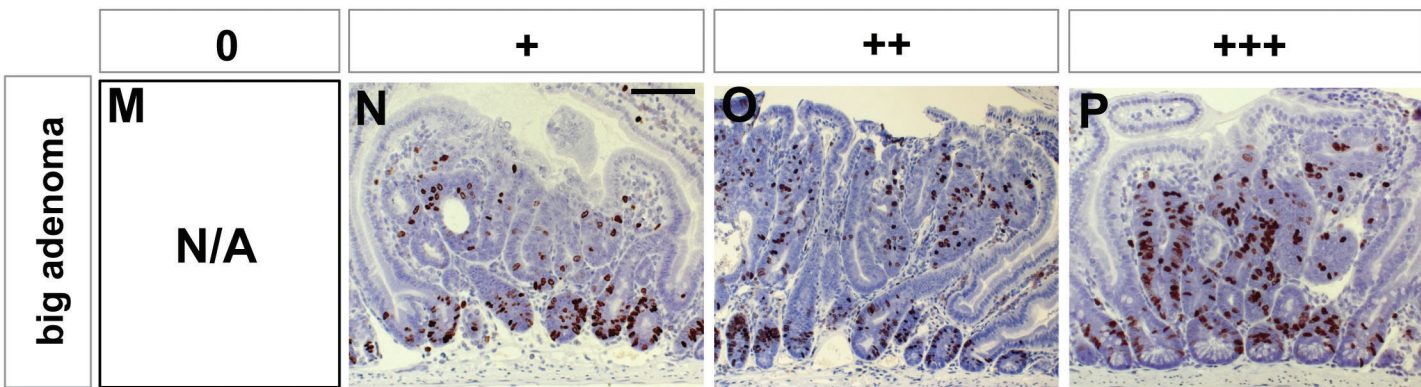

Figure S7

**Figure S7: Assessment of tumour type and BrdU levels in control and *Min*; *AhCre Src<sup>fl/fl</sup>* intestines.** (A-P) Representative examples of the tumour types observed (columns) and BrdU scores assigned (rows) in the characterization of intestinal adenomas from control (*Min*) and *Min*; *AhCre Src<sup>fl/fl</sup>* mice presented in Figure 8 D-F. Scale bars: 100um.
