# Supplementary material for: c-Src drives intestinal regeneration and transformation
Source: PubMed Central journal article supplement — EMBO J. 2014 Apr 30;33(13):1474–91. doi: 10.1002/embj.201387454 (PMC4194090; doi:10.1002/embj.201387454), 2014-04-30
Supplement: embj0033-1474-sd8.pdf [file embj0033-1474-sd8.pdf]

|                  |                         |
|------------------|-------------------------|
| <i>rpl32 f</i>   | AGGCCCAAGATCGTGAAGAA    |
| <i>rpl32 r</i>   | TGTTGCACCAGGAACTTCTTGAA |
| <i>src42 f</i>   | GTTGCTGAGGTGGAATGCAA    |
| <i>src42 r</i>   | GCGTATAAATCCGACCAAGTGC  |
| <i>src64 f</i>   | GTGAATGCATCAGCGCAACT    |
| <i>src64 r</i>   | TCCGTGTGCTGATCTCCTTG    |
| <i>egfr f</i>    | ACGATGGGACCACGATACAT    |
| <i>egfr r</i>    | GGTGGGTTCCTCGATATTC     |
| <i>socs36e f</i> | ATGACCGTGCACTCGCAAAT    |
| <i>socs36e r</i> | CCTCGTAGCGGTCCATCTTG    |
| <i>puc f</i>     | CATCTCGCCCAATCTGAACT    |
| <i>puc r</i>     | CCCACAGAAGATGACGAAGG    |

**Supplementary Table S1:** Sequences of the RT-qPCR primers used in this study.
