# Supplementary material for: c-Src drives intestinal regeneration and transformation
Source: PubMed Central journal article supplement — EMBO J. 2014 Apr 30;33(13):1474–91. doi: 10.1002/embj.201387454 (PMC4194090; doi:10.1002/embj.201387454), 2014-04-30
Supplement: embj0033-1474-sd9.pdf [file embj0033-1474-sd9.pdf]

## Supplementary Materials and Methods

### Fly Genotypes

*yw; escargot-gal4, UAS-gfp/+; tub-gal80<sup>ts</sup>/+*

*yw; escargot-gal4, UAS-gfp/UAS-*Src64*<sup>wt</sup>; tub-gal80<sup>ts</sup>/+*

*yw; escargot-gal4, UAS-gfp/+; tub-gal80<sup>ts</sup>/UAS-*Src42*<sup>CA</sup>*

*UAS-Dicer2/UAS-Csk-IR; escargot-gal4, UAS-gfp/UAS-*Src64*<sup>wt</sup>; tub-gal80<sup>ts</sup>/+*

*yw; escargot-gal4, UAS-gfp/UAS-*Src64*<sup>wt</sup>; tub-gal80<sup>ts</sup>/UAS-*ChK**

*UAS-Dicer2/+; escargot-gal4, UAS-gfp/+; tub-gal80<sup>ts</sup>/+*

*UAS-Dicer2/+; escargot-gal4, UAS-gfp/UAS-*Src42-IR*<sup>KK</sup>; tub-gal80<sup>ts</sup>/+*

*UAS-Dicer2/+; escargot-gal4, UAS-gfp/UAS-*Src42-IR*<sup>CG</sup>; tub-gal80<sup>ts</sup>/+*

*yw; escargot-gal4, UAS-gfp/ *Src42*<sup>K10108</sup>; tub-gal80<sup>ts</sup>/+*

*w<sup>-</sup>; esg-gal4, tub-gal80<sup>ts</sup>, UAS-gfp/+; UAS-*flp*, act>CD2>gal4/+*

*w<sup>-</sup>; esg-gal4, tub-gal80<sup>ts</sup>, UAS-gfp/ UAS-*Src42-IR*<sup>CG</sup>; UAS-*flp*, act>CD2>gal4/+*

*y,w,hsFlp/+; UAS-CD8-gfp, tub-gal4/+; FRT82B, tub-gal80/LacZ FRT82B*

*y,w,hsFlp/+; UAS-CD8-gfp, tub-gal4/+; FRT82B, tub-gal80/*Apc1*<sup>Q8</sup>FRT82B*

*y,w,hsFlp/+; UAS-CD8-gfp, tub-gal4/ UAS-*Src42-IR*<sup>CG</sup>; FRT82B, tub-gal80/LacZ  
FRT82B*

*y,w,hsFlp/+; UAS-CD8-gfp, tub-gal4/ UAS-*Src42-IR*<sup>CG</sup>; FRT82B, tub-  
gal80/*Apc1*<sup>Q8</sup>FRT82B*

*yw; escargot-gal4, UAS-gfp/UAS-*Src64*<sup>wt</sup>; tub-gal80<sup>ts</sup>/UAS-*Ras-IR**

*yw; escargot-gal4, UAS-gfp/UAS-*Src64*<sup>wt</sup>; tub-gal80<sup>ts</sup>/UAS-*egfr*<sup>DN</sup>*

*yw; escargot-gal4, UAS-gfp/UAS-*Ras-IR*; tub-gal80<sup>ts</sup>/UAS-*Src42*<sup>CA</sup>*

*yw; escargot-gal4, UAS-gfp/UAS-*egfr-IR*; tub-gal80<sup>ts</sup>/UAS-*Src42*<sup>CA</sup>*

*yw; esg-gal4, UAS-GFP/EGFR<sup>TOP1</sup>; tub-gal80<sup>ts</sup>/UAS-*Src42*<sup>CA</sup>*

*yw; escargot-gal4, UAS-gfp/UAS-stat-IR; tub-gal80<sup>ts</sup>/UAS-Src42<sup>CA</sup>*  
*yw; escargot-gal4, UAS-gfp/UAS-dome-IR; tub-gal80<sup>ts</sup>/UAS-Src42<sup>CA</sup>*  
*yw; escargot-gal4, UAS-gfp/+; tub-gal80<sup>ts</sup>/UAS-Ras-IR*  
*yw; escargot-gal4, UAS-gfp/UAS-egfr-IR; tub-gal80<sup>ts</sup>/+*  
*yw; escargot-gal4, UAS-gfp/UAS-stat-IR; tub-gal80<sup>ts</sup>/+*  
*yw; escargot-gal4, UAS-gfp/UAS-dome-IR; tub-gal80<sup>ts</sup>/+*  
*UAS-JNK<sup>DN</sup>/+; escargot-gal4, UAS-gfp/UAS-Src64<sup>wt</sup>; tub-gal80<sup>ts</sup>/+*

### **Mouse Strains**

*AhCre* (Ireland et al, 2004)

*LGR5-CreER* (Barker et al, 2009)

*Rosa-LacZ* (Soriano, 1999)

*Apc<sup>fl/fl</sup>* (Shibata et al, 1997)

*Apc<sup>Min/+</sup>* (Su et al, 1992)

*Src<sup>fl/fl</sup>* (Marcotte et al, 2012)

*Fyn KO* (Stein et al, 1992)

*Yes KO* (Stein et al, 1994)

### **In situ detection of LacZ expression**

To determine the pattern of recombination at the *Rosa26R* reporter locus frozen tissue sections were stained using a  $\beta$ -Gal staining kit (K1465-01; Invitrogen) and following manufacturer's instructions (Figure S5L, M).  $\beta$ -Gal staining of whole-mount tissues (Figure S5K) was done in a 5% X-Gal solution (B4252; Sigma).

### **Quantification of cell proliferation and migration by BrdU incorporation**

Intestinal proliferation was scored by quantifying the numbers of BrdU<sup>+ve</sup> cells present within randomly selected fifty half crypts from small intestinal gut rolls after a two-hour of BrdU pulse-chase. The average number of BrdU<sup>+ve</sup> cells per mouse intestine was then calculated.

Cell migration was scored by quantification of the position of BrdU<sup>+ve</sup> cells within twenty-five randomly selected crypt/villae units from small intestinal gut rolls following a 48-hour BrdU pulse-chase. The cumulative percentage of BrdU<sup>+ve</sup> cells along the crypt/villae axis per mouse intestine was then calculated.

### **Quantification of Crypt Apoptosis and Mitosis**

Apoptosis and mitotic index within small intestinal crypts was scored from H&E-stained sections as previously described (Sansom et al, 2004).

### **Quantification of Crypt length**

Length from a minimum of fifty small intestinal crypts was scored using ImageJ. Data represents average values (in  $\mu\text{m}$ ) from three mice.

## References

Barker N, Ridgway RA, van Es JH, van de Wetering M, Begthel H, van den Born M, Danenberg E, Clarke AR, Sansom OJ, Clevers H (2009) Crypt stem cells as the cells-of-origin of intestinal cancer. *Nature* **457**: 608-611

Ireland H, Kemp R, Houghton C, Howard L, Clarke A, Sansom O, Winton D. (2004) Inducible Cre-mediated control of gene expression in the murine gastrointestinal tract: effect of loss of beta-catenin. *Gastroenterology*, Vol. 126, pp. 1236-1246.

Marcotte R, Smith HW, Sanguin-Gendreau V, McDonough RV, Muller WJ (2012) Mammary epithelial-specific disruption of c-Src impairs cell cycle progression and tumorigenesis. *Proc Natl Acad Sci U S A* **109**: 2808-2813

Sansom OJ, Reed KR, Hayes AJ, Ireland H, Brinkmann H, Newton IP, Battle E, Simon-Assmann P, Clevers H, Nathke IS, Clarke AR, Winton DJ (2004) Loss of Apc in vivo immediately perturbs Wnt signaling, differentiation, and migration. *Genes Dev* **18**: 1385-1390

Shibata H, Toyama K, Shioya H, Ito M, Hirota M, Hasegawa S, Matsumoto H, Takano H, Akiyama T, Toyoshima K, Kanamaru R, Kanegae Y, Saito I, Nakamura Y, Shiba K, Noda T (1997) Rapid colorectal adenoma formation initiated by conditional targeting of the Apc gene. *Science (New York, NY)* **278**: 120-123

Soriano P (1999) Generalized lacZ expression with the ROSA26 Cre reporter strain. *Nat Genet* **21**: 70-71

Stein PL, Lee HM, Rich S, Soriano P (1992) pp59fyn mutant mice display differential signaling in thymocytes and peripheral T cells. *Cell* **70**: 741-750

Stein PL, Vogel H, Soriano P (1994) Combined deficiencies of Src, Fyn, and Yes tyrosine kinases in mutant mice. *Genes Dev* **8**: 1999-2007

Su LK, Kinzler KW, Vogelstein B, Preisinger AC, Moser AR, Luongo C, Gould KA, Dove WF (1992) Multiple intestinal neoplasia caused by a mutation in the murine homolog of the APC gene. *Science (New York, NY)* **256**: 668-670
